# Supplementary material for: Radiomic Features and Machine Learning for the Discrimination of Renal Tumor Histological Subtypes: A Pragmatic Study Using Clinical-Routine Computed Tomography
Source: MDPI journal article supplement (doi:10.3390/cancers12103010), 2020-10-16
Supplement: s1 [file s1]

# Supplementary Material: Radiomic Features and Machine Learning for Discrimination of Renal Tumor Histological Subtypes: A Pragmatic Study Using Clinical Routine Computed Tomography

Johannes Uhlig, Andreas Leha, Laura M. Delonge, Anna-Maria Haack, Brian Such, Hyun S. Kim, Felix Bremmer, Lutz Trojan, Joachim Lotz, Annemarie Uhlig

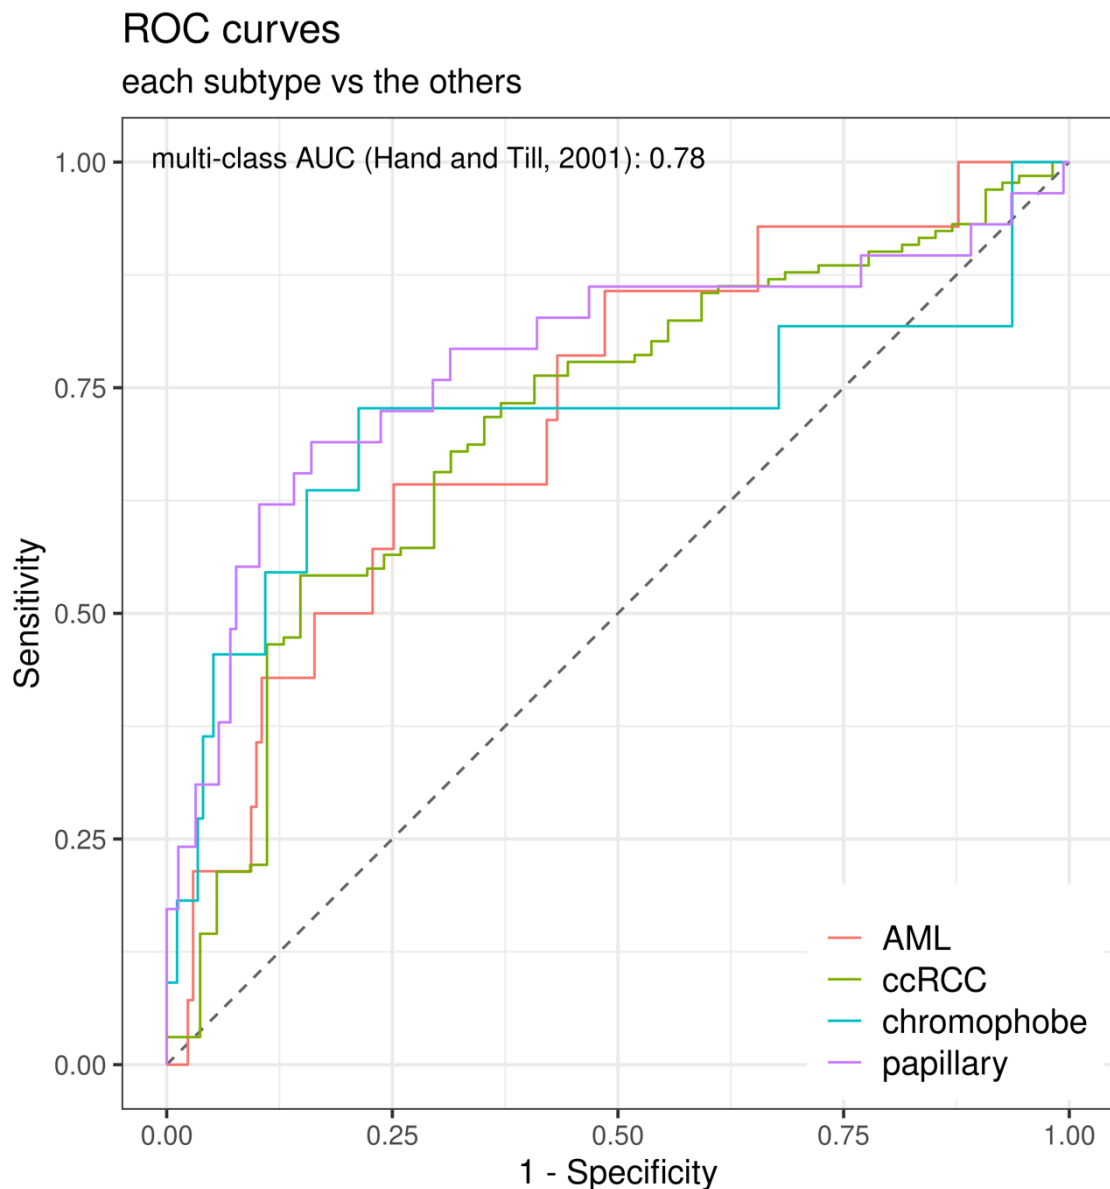

**Figure S1.** ROC curves for the random forest “ranger” classifier in the upsampled subcohort excluding oncocytomas, with SMOTE and without feature selection. The displayed receiver-operating characteristics (ROC) curves show the discrimination of each subtype vs. the remaining ones as determined by the multi-class AUC described by Hand and Till [30]. AML: angiomyolipoma; ccRCC clear cell renal cell carcinoma; AUC: area under the ROC curve.

**Table S1.** Details on histological grading and T stage of malignant renal tumor subtypes.

| Parameter            | Level | Total       | ccRCC       | Chromophobe | Papillary  | p Value |
|----------------------|-------|-------------|-------------|-------------|------------|---------|
| <i>n</i>             |       | 171         | 131         | 11          | 29         |         |
| histological grading | G1    | 27 (15.8%)  | 20 (15.3%)  | 1 (9.1%)    | 6 (20.7%)  | 0.45    |
|                      | G2    | 118 (69.0%) | 91 (69.5%)  | 7 (63.6%)   | 20 (69.0%) |         |
|                      | G3    | 7 (4.1%)    | 7 (5.3%)    | 0 (0.0%)    | 0 (0.0%)   |         |
|                      | Gx    | 19 (11.1%)  | 13 (9.9%)   | 3 (27.3%)   | 3 (10.3%)  |         |
| T stage              | T1    | 137 (80.1%) | 107 (81.7%) | 8 (72.7%)   | 22 (75.9%) | 0.55    |
|                      | T2    | 8 (4.7%)    | 4 (3.1%)    | 2 (18.2%)   | 2 (6.9%)   |         |
|                      | T3    | 23 (13.5%)  | 17 (13.0%)  | 1 (9.1%)    | 5 (17.2%)  |         |
|                      | T4    | 1 (0.6%)    | 1 (0.8%)    | 0 (0.0%)    | 0 (0.0%)   |         |
|                      | Tx    | 2 (1.2%)    | 2 (1.5%)    | 0 (0.0%)    | 0 (0.0%)   |         |

n: number; ccRCC: clear cell renal cell carcinoma.

**Table S2.** Sensitivity/specificity in the classification of different subtypes for the combinations of various machine learning models, feature selection and imbalance handling methods.

| Machine Learning Algorithm | Subtype     | No Upsampling |           |           | SMOTE     |           |           |
|----------------------------|-------------|---------------|-----------|-----------|-----------|-----------|-----------|
|                            |             | No FS         | RFE       | PCA       | No FS     | RFE       | PCA       |
| C5.0                       | AML         | 0.20/0.98     | 0.35/0.97 | 0.10/0.98 | 0.15/0.96 | 0.35/0.93 | 0.10/0.94 |
|                            | ccRCC       | 0.88/0.29     | 0.87/0.23 | 0.87/0.24 | 0.76/0.31 | 0.79/0.47 | 0.69/0.43 |
|                            | chromophobe | 0.20/0.96     | 0.20/0.96 | 0.10/0.97 | 0.20/0.95 | 0.10/0.98 | 0.20/0.91 |
|                            | oncocytoma  | 0.05/0.98     | 0.00/0.99 | 0.05/0.98 | 0.00/0.94 | 0.00/0.91 | 0.10/0.94 |
|                            | papillary   | 0.23/0.94     | 0.07/0.95 | 0.17/0.93 | 0.30/0.93 | 0.33/0.93 | 0.25/0.91 |
| glmnet                     | AML         | 0.15/0.97     | 0.40/0.97 | 0.25/0.99 | 0.45/0.93 | 0.55/0.95 | 0.30/0.95 |
|                            | ccRCC       | 0.92/0.23     | 0.93/0.24 | 0.96/0.13 | 0.67/0.56 | 0.75/0.54 | 0.78/0.41 |
|                            | chromophobe | 0.10/0.98     | 0.10/0.98 | 0.10/0.98 | 0.20/0.95 | 0.20/0.94 | 0.35/0.92 |
|                            | oncocytoma  | 0.00/0.99     | 0.00/0.99 | 0.00/1.00 | 0.10/0.88 | 0.05/0.90 | 0.05/0.96 |
|                            | papillary   | 0.08/0.94     | 0.12/0.96 | 0.03/0.98 | 0.28/0.89 | 0.32/0.93 | 0.17/0.94 |
| knn                        | AML         | 0.00/1.00     | 0.00/0.99 | 0.05/0.99 | 0.15/0.91 | 0.20/0.93 | 0.25/0.94 |
|                            | ccRCC       | 0.99/0.03     | 0.98/0.04 | 0.94/0.07 | 0.49/0.76 | 0.52/0.69 | 0.60/0.67 |
|                            | chromophobe | 0.00/1.00     | 0.00/1.00 | 0.10/0.99 | 0.25/0.87 | 0.25/0.88 | 0.20/0.87 |
|                            | oncocytoma  | 0.00/1.00     | 0.00/0.99 | 0.00/1.00 | 0.20/0.79 | 0.20/0.81 | 0.25/0.87 |
|                            | papillary   | 0.00/0.98     | 0.00/0.98 | 0.03/0.95 | 0.32/0.87 | 0.18/0.86 | 0.20/0.87 |
| nnet                       | AML         | 0.15/0.96     | 0.15/0.93 | 0.20/0.98 | 0.50/0.91 | 0.50/0.88 | 0.55/0.90 |
|                            | ccRCC       | 0.73/0.53     | 0.95/0.20 | 0.90/0.24 | 0.61/0.56 | 0.80/0.40 | 0.81/0.37 |
|                            | chromophobe | 0.00/0.99     | 0.00/1.00 | 0.00/0.98 | 0.30/0.92 | 0.25/0.95 | 0.05/0.96 |
|                            | oncocytoma  | 0.05/0.97     | 0.00/1.00 | 0.10/0.99 | 0.15/0.85 | 0.00/0.97 | 0.05/0.97 |
|                            | papillary   | 0.37/0.74     | 0.07/0.98 | 0.10/0.92 | 0.20/0.92 | 0.03/0.95 | 0.07/0.96 |
| ranger                     | AML         | 0.10/0.99     | 0.00/0.99 | 0.15/0.99 | 0.15/0.97 | 0.20/0.97 | 0.10/0.95 |
|                            | ccRCC       | 0.95/0.09     | 0.96/0.04 | 0.94/0.13 | 0.86/0.21 | 0.92/0.17 | 0.78/0.30 |
|                            | chromophobe | 0.00/0.99     | 0.00/0.99 | 0.00/0.98 | 0.25/0.94 | 0.10/0.97 | 0.10/0.92 |
|                            | oncocytoma  | 0.00/0.99     | 0.00/1.00 | 0.00/0.99 | 0.00/0.98 | 0.00/0.99 | 0.15/0.97 |
|                            | papillary   | 0.07/0.98     | 0.03/0.98 | 0.15/0.97 | 0.07/0.97 | 0.07/0.98 | 0.13/0.95 |
| rf                         | AML         | 0.00/0.99     | 0.00/0.99 | 0.15/0.99 | 0.10/0.96 | 0.40/0.97 | 0.15/0.92 |
|                            | ccRCC       | 0.95/0.06     | 0.96/0.07 | 0.92/0.14 | 0.91/0.26 | 0.89/0.23 | 0.79/0.34 |
|                            | chromophobe | 0.00/0.98     | 0.00/0.99 | 0.10/0.98 | 0.25/0.94 | 0.20/0.97 | 0.30/0.92 |
|                            | oncocytoma  | 0.00/0.99     | 0.05/0.99 | 0.00/0.99 | 0.00/0.99 | 0.00/0.99 | 0.00/0.97 |
|                            | papillary   | 0.03/0.98     | 0.03/0.98 | 0.15/0.96 | 0.12/0.98 | 0.07/0.96 | 0.22/0.97 |
| svmRadial                  | AML         | 0.00/1.00     | 0.00/1.00 | 0.00/1.00 | 0.00/0.99 | 0.10/1.00 | 0.00/0.99 |
|                            | ccRCC       | 0.98/0.01     | 0.98/0.00 | 0.99/0.01 | 0.88/0.27 | 0.89/0.30 | 0.85/0.17 |
|                            | chromophobe | 0.00/0.99     | 0.00/0.99 | 0.00/0.99 | 0.15/0.97 | 0.15/0.98 | 0.00/0.96 |
|                            | oncocytoma  | 0.00/1.00     | 0.00/1.00 | 0.00/1.00 | 0.00/1.00 | 0.00/0.99 | 0.00/0.98 |
|                            | papillary   | 0.00/0.98     | 0.00/0.99 | 0.00/0.99 | 0.28/0.89 | 0.35/0.90 | 0.18/0.92 |
| xgbTree                    | AML         | 0.05/0.99     | 0.20/0.98 | 0.15/0.99 | 0.25/0.95 | 0.55/0.94 | 0.15/0.93 |
|                            | ccRCC       | 0.90/0.26     | 0.92/0.26 | 0.91/0.20 | 0.78/0.41 | 0.80/0.41 | 0.74/0.39 |
|                            | chromophobe | 0.20/0.98     | 0.10/0.98 | 0.10/0.97 | 0.10/0.97 | 0.05/0.97 | 0.05/0.95 |
|                            | oncocytoma  | 0.00/0.98     | 0.05/0.98 | 0.00/0.99 | 0.05/0.96 | 0.05/0.95 | 0.25/0.96 |

|                 |           |           |           |           |           |           |
|-----------------|-----------|-----------|-----------|-----------|-----------|-----------|
| _____ papillary | 0.22/0.92 | 0.07/0.94 | 0.13/0.95 | 0.35/0.89 | 0.28/0.93 | 0.28/0.90 |
|-----------------|-----------|-----------|-----------|-----------|-----------|-----------|

FS: feature selection; glmnet: elastic net penalized multinomial regression; nnet: neural network; rf: random forest; svmRadial: support vector machine using a radial kernel; xgboost: extreme gradient boosting; RFE: recursive feature elimination; PCA: principle component analysis.

**Table S3.** Differences in patient age, gender, and largest 3-dimensional (3D) diameter according to renal tumor subtype in the cohort excluding oncocytomas, without and with synthetic minority oversampling technique (SMOTE).

| Cohort            | Parameter         | Level             | Total        | ccRCC        | Papillary    | AML          | Chromophobe  | p Value     |
|-------------------|-------------------|-------------------|--------------|--------------|--------------|--------------|--------------|-------------|
| Without SMOTE     | n                 |                   | 185          | 131          | 29           | 14           | 11           |             |
|                   | age               |                   |              |              |              |              |              | 0.01        |
|                   |                   | mean ± sd         |              | 65 ± 12      | 65 ± 11      | 67 ± 11      | 56 ± 14      | 60 ± 9.2    |
|                   |                   | median (min; max) |              | 66 (31; 85)  | 68 (31; 85)  | 68 (40; 81)  | 56 (31; 76)  | 59 (47; 78) |
|                   | gender            |                   |              |              |              |              |              | <0.01       |
|                   |                   | female            |              | 64 (34.6%)   | 43 (32.8%)   | 5 (17.2%)    | 9 (64.3%)    | 7 (63.6%)   |
|                   |                   | male              |              | 121 (65.4%)  | 88 (67.2%)   | 24 (82.8%)   | 5 (35.7%)    | 4 (36.4%)   |
|                   | Maximum3DDiameter |                   |              |              |              |              |              | 0.30        |
| mean ± sd         |                   |                   | 58 ± 28      | 57 ± 23      | 57 ± 35      | 51 ± 35      | 72 ± 48      |             |
| median (min; max) |                   |                   | 52 (13; 192) | 54 (21; 144) | 47 (22; 183) | 43 (13; 127) | 59 (16; 192) |             |
| With SMOTE        | n                 |                   | 325          | 131          | 58           | 70           | 66           |             |
|                   | age               |                   |              |              |              |              |              | <0.01       |
|                   |                   | mean ± sd         |              | 62 ± 11      | 65 ± 11      | 66 ± 11      | 57 ± 12      | 59 ± 7.7    |
|                   |                   | median (min; max) |              | 64 (31; 85)  | 68 (31; 85)  | 68 (40; 81)  | 56 (31; 76)  | 59 (47; 78) |
|                   | gender            |                   |              |              |              |              |              | <0.01       |
|                   |                   | female            |              | 146 (44.9%)  | 43 (32.8%)   | 8 (13.8%)    | 47 (67.1%)   | 48 (72.7%)  |
|                   |                   | male              |              | 179 (55.1%)  | 88 (67.2%)   | 50 (86.2%)   | 23 (32.9%)   | 18 (27.3%)  |
|                   | Maximum3DDiameter |                   |              |              |              |              |              | <0.01       |
| mean ± sd         |                   |                   | 57 ± 28      | 57 ± 23      | 55 ± 31      | 48 ± 27      | 68 ± 32      |             |
| median (min; max) |                   |                   | 51 (13; 192) | 54 (21; 144) | 46 (22; 183) | 41 (13; 127) | 62 (16; 192) |             |

n: number; sd: standard deviation; ccRCC: clear cell renal cell carcinoma; AML: angiomyolipoma.

**Table S4.** Area under the receiver-operating characteristics curve (AUC) for the combinations of various machine learning models, feature selection and imbalance handling in the subgroup analysis excluding patients with oncocytomas.

| Machine Learning Algorithm | No Upsampling        |      |      | SMOTE                |      |      |
|----------------------------|----------------------|------|------|----------------------|------|------|
|                            | No Feature Selection | RFE  | PCA  | No Feature Selection | RFE  | PCA  |
| C5.0                       | 0.59                 | 0.65 | 0.60 | 0.74                 | 0.70 | 0.73 |
| glmnet                     | 0.67                 | 0.67 | 0.68 | 0.69                 | 0.68 | 0.71 |
| knn                        | 0.57                 | 0.63 | 0.59 | 0.62                 | 0.64 | 0.62 |
| nnet                       | 0.65                 | 0.63 | 0.66 | 0.68                 | 0.67 | 0.73 |
| ranger                     | 0.73                 | 0.64 | 0.74 | 0.78                 | 0.65 | 0.75 |
| rf                         | 0.70                 | 0.64 | 0.75 | 0.75                 | 0.65 | 0.73 |
| svmRadial                  | 0.71                 | 0.63 | 0.72 | 0.72                 | 0.64 | 0.71 |
| xgboost                    | 0.70                 | 0.64 | 0.69 | 0.73                 | 0.66 | 0.72 |

C5.0: boosted classification tree; glmnet: elastic net penalized multinomial regression; knn: k-nearest neighbors; nnet: neural network; rf: random forest; svmRadial: support vector machine using a radial kernel; xgboost: extreme gradient boosting; rfe: recursive feature elimination; PCA: principle component analysis; SMOTE: synthetic minority oversampling technique.

**Table S5.** Area under the receiver-operating characteristics curve (AUC) for the combinations of various machine learning models, feature selection and imbalance handling in the subgroup analysis including only the  $n = 104$  patients with CT scans with slice thickness  $<3\text{mm}$ .

| Machine Learning Algorithm | No Upsampling |      |      | SMOTE |      |      |
|----------------------------|---------------|------|------|-------|------|------|
|                            | No FS         | RFE  | PCA  | No FS | RFE  | PCA  |
| C5.0                       | 0.62          | 0.63 | 0.59 | 0.57  | 0.62 | 0.64 |
| glmnet                     | 0.56          | 0.62 | 0.64 | 0.60  | 0.64 | 0.70 |
| knn                        | 0.57          | 0.55 | 0.61 | 0.58  | 0.54 | 0.59 |
| nnet                       | 0.61          | 0.60 | 0.61 | 0.60  | 0.54 | 0.60 |
| ranger                     | 0.67          | 0.58 | 0.68 | 0.66  | 0.59 | 0.68 |
| rf                         | 0.69          | 0.58 | 0.68 | 0.66  | 0.57 | 0.70 |
| svmRadial                  | 0.69          | 0.63 | 0.67 | 0.66  | 0.63 | 0.64 |
| xgboost                    | 0.68          | 0.66 | 0.63 | 0.64  | 0.64 | 0.72 |

C5.0: boosted classification tree; glmnet: elastic net penalized multinomial regression; knn: k-nearest neighbors; nnet: neural network; rf: random forest; svmRadial: support vector machine using a radial kernel; xgboost: extreme gradient boosting; FS: feature selection; RFE: recursive feature elimination; PCA: principle component analysis; SMOTE: synthetic minority oversampling technique.

**Table S6.** Area under the receiver-operating characteristics curve (AUC) for the combinations of various machine learning models, feature selection and imbalance handling in the subgroup analysis including only the  $n = 167$  external patients.

| Machine Learning Algorithm | No Upsampling |      |      | SMOTE |      |      |
|----------------------------|---------------|------|------|-------|------|------|
|                            | No FS         | RFE  | PCA  | No FS | RFE  | PCA  |
| C5.0                       | 0.47          | 0.40 | 0.56 | 0.56  | 0.47 | 0.63 |
| glmnet                     | 0.64          | 0.64 | 0.64 | 0.68  | 0.68 | 0.62 |
| knn                        | 0.38          | 0.37 | 0.39 | 0.41  | 0.40 | 0.40 |
| nnet                       | 0.55          | 0.46 | 0.54 | 0.64  | 0.60 | 0.62 |
| ranger                     | 0.64          | 0.60 | 0.68 | 0.64  | 0.60 | 0.66 |
| rf                         | 0.62          | 0.60 | 0.64 | 0.66  | 0.64 | 0.64 |
| svmRadial                  | 0.63          | 0.62 | 0.64 | 0.65  | 0.60 | 0.64 |
| xgboost                    | 0.68          | 0.63 | 0.60 | 0.64  | 0.62 | 0.63 |

C5.0: boosted classification tree; glmnet: elastic net penalized multinomial regression; knn: k-nearest neighbors; nnet: neural network; rf: random forest; svmRadial: support vector machine using a radial kernel; xgboost: extreme gradient boosting; FS: feature selection; RFE: recursive feature elimination; PCA: principle component analysis; SMOTE: synthetic minority oversampling technique.

**Table S7.** Area under the receiver-operating characteristics curve (AUC) for the combinations of various machine learning models, feature selection and imbalance handling in the subgroup analysis including only the  $n = 141$  patients without artefacts in the CT scans.

| Machine Learning Algorithm | No Upsampling |      |      | SMOTE |      |      |
|----------------------------|---------------|------|------|-------|------|------|
|                            | No FS         | RFE  | PCA  | No FS | RFE  | PCA  |
| C5.0                       | 0.56          | 0.55 | 0.55 | 0.66  | 0.62 | 0.57 |
| glmnet                     | 0.68          | 0.61 | 0.65 | 0.68  | 0.61 | 0.67 |
| knn                        | 0.57          | 0.57 | 0.60 | 0.62  | 0.53 | 0.64 |
| nnet                       | 0.61          | 0.60 | 0.57 | 0.69  | 0.59 | 0.59 |
| ranger                     | 0.62          | 0.59 | 0.69 | 0.64  | 0.59 | 0.69 |
| rf                         | 0.66          | 0.58 | 0.65 | 0.66  | 0.58 | 0.66 |
| svmRadial                  | 0.64          | 0.63 | 0.70 | 0.64  | 0.60 | 0.68 |
| xgboost                    | 0.68          | 0.61 | 0.63 | 0.68  | 0.61 | 0.64 |

C5.0: boosted classification tree; glmnet: elastic net penalized multinomial regression; knn: k-nearest neighbors; nnet: neural network; rf: random forest; svmRadial: support vector machine using a radial kernel; xgboost: extreme gradient boosting; FS: feature selection; RFE: recursive feature elimination; PCA: principle component analysis; SMOTE: synthetic minority oversampling technique.

**Table S8.** Area under the receiver-operating characteristics curve (AUC) for the combinations of various machine learning models and feature selection with class weights set as inverse class probability.

| Machine Learning Algorithm | Weighting Without Feature Selection | Weighting With RFE | Weighting With PCA |
|----------------------------|-------------------------------------|--------------------|--------------------|
| glmnet                     | 0.67                                | 0.66               | 0.68               |
| nnet                       | 0.65                                | 0.65               | 0.6                |
| ranger                     | 0.69                                | 0.72               | 0.64               |
| rf                         | 0.7                                 | 0.69               | 0.65               |
| svmRadial                  | 0.33                                | 0.32               | 0.37               |
| xgboost                    | 0.5                                 | 0.5                | 0.5                |

glmnet: elastic net penalized multinomial regression; nnet: neural network; rf: random forest; svmRadial: support vector machine using a radial kernel; xgboost: extreme gradient boosting; rfe: recursive feature elimination; PCA: principle component analysis.

**Table S9.** Details on evaluated radiomic features.

| Radiomic Feature Class                           | Abbreviation | Summary                                                                                               |
|--------------------------------------------------|--------------|-------------------------------------------------------------------------------------------------------|
| first-order statistic                            |              | describing renal mass voxel intensity                                                                 |
| 3D shape features                                |              | describing 3-dimensional size and shape of renal mass                                                 |
| 2D shape features                                |              | describing 2-dimensional size and shape of renal mass                                                 |
| gray level co-occurrence matrix features         | GLCM         | describing second-order joint probability function of renal mass                                      |
| gray level size zone matrix features             | GLSZM        | quantifying gray level zones in renal mass                                                            |
| gray level run length matrix features            | GLRLM        | quantifying gray level runs in renal mass                                                             |
| neighboring gray tone difference matrix features | NGTDM        | quantifying the difference between a gray value and average gray value of its neighbors in renal mass |
| gray level dependence matrix features            | GLDM         | quantifying gray level dependencies of renal mass                                                     |

**Table S10.** Details on evaluated machine learning algorithms.

| Radiomic Feature Class       | Abbreviation | Summary                                                                                                                                                                                                                                                                                                                                                                                                                                                                                  |
|------------------------------|--------------|------------------------------------------------------------------------------------------------------------------------------------------------------------------------------------------------------------------------------------------------------------------------------------------------------------------------------------------------------------------------------------------------------------------------------------------------------------------------------------------|
| Random forest                | RF           | used 1000 bootstrap samples and majority votes to reach a final model. At each tree node, a random subset of size mtry of variables from the full sample was provided, of which the algorithm picks the one best classifying the respective outcome. The size of the variable subset at each node as well as the size of the terminal node up unto which the tree is grown were optimized using the out-of-bag (OOB) error in a grid search.                                             |
| Random Forest                | ranger       | a different implementation of random forests. Single trees were fit to their full size (min.node.size = 1). At each tree node, a random subset of size mtry of variables from the full sample was provided, of which the algorithm picks the one best classifying the respective outcome. The samples are split into two groups according to this variable. The splitting rule (splitrule) as well as the number of randomly selected variables (mtry) were optimized in an internal CV. |
| Extreme gradient boosting    | XG boost     | tree-based optimization and boosting model. The number of boosting iterations (nrounds) was set to 100 with early stopping allowed after 3 iterations without performance improvement. The maximum tree depth (max_depth), the shrinkage (eta) to control learning rate, and the minimum sum of instance weight (min_child_weight) to indicate the minimum number of observations in a terminal node were optimized using an internal CV.                                                |
| Boosted classification trees | C5.0         | AdaBoost type boosting of C5.0 decision trees. The number of boosting iterations (trials), whether to use trees or rule-based classifiers (model) and whether to enable winnowing (winnow) have been optimized in an internal CV.                                                                                                                                                                                                                                                        |
| Elastic net penalized        | glmnet       | The parameter to scale between lasso and ridge regression (alpha) and the penalization factor (lambda) have been optimized in an internal CV.                                                                                                                                                                                                                                                                                                                                            |

|                        |     |                                                                                                                                                                                                                                                                                                                                                                                                                                    |
|------------------------|-----|------------------------------------------------------------------------------------------------------------------------------------------------------------------------------------------------------------------------------------------------------------------------------------------------------------------------------------------------------------------------------------------------------------------------------------|
| multinomial regression |     |                                                                                                                                                                                                                                                                                                                                                                                                                                    |
| Support vector machine | SVM | creates a multidimensional space with one dimension for each input variable, using a radial kernel. A hyperplane is fit for optimized discrimination of plotted observations which maximizes the distance between outcome classes (margin). Tuning parameters are the degree of self-regularization (cost) and a kernel-specific parameter to define the gaussian distribution (sigma). These were optimized using an internal CV. |
| k-nearest neighbors    | KNN | plots observations in multidimensional space and compares each observation to its neighbors with regard to covariates and outcomes. Tuning parameter is the number of neighbors (k), of which one given observation is compared to for prediction of its outcome.                                                                                                                                                                  |
| Neural network         | NN  | The NN architecture contains one input layer, one hidden layer, and one output layer that are interconnected with links and associated weights. Tuning parameters include the number of nodes in the hidden layer (size), and the weight decay (decay) that penalizes highly influential weights to regulate the network.                                                                                                          |

**Publisher's Note:** MDPI stays neutral with regard to jurisdictional claims in published maps and institutional affiliations.

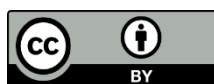

© 2020 by the authors. Licensee MDPI, Basel, Switzerland. This article is an open access article distributed under the terms and conditions of the Creative Commons Attribution (CC BY) license (<http://creativecommons.org/licenses/by/4.0/>).
